# Supplementary material
Source: PubMed Central journal article supplement (PMC1276067)

**a**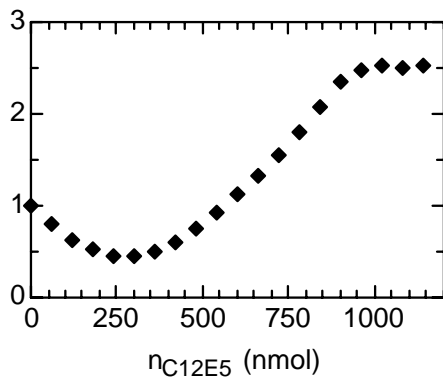**b**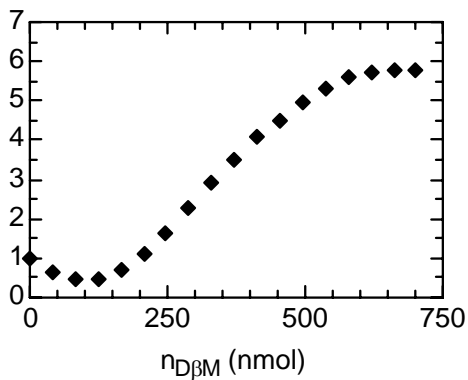**c**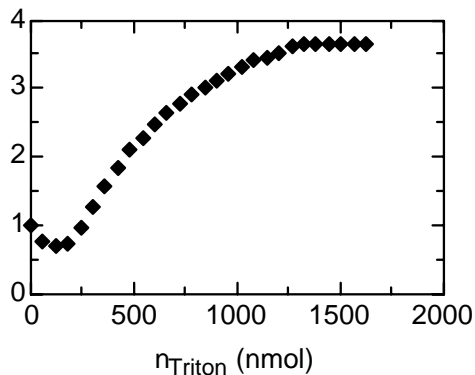**d**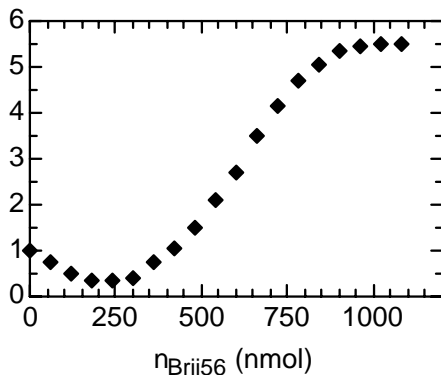**e**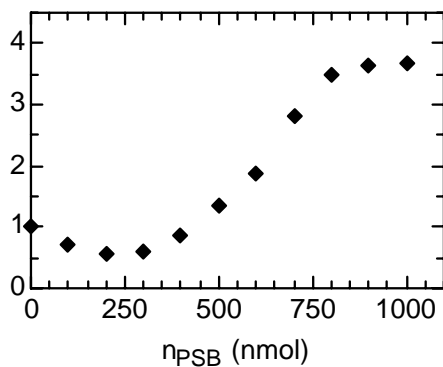**f**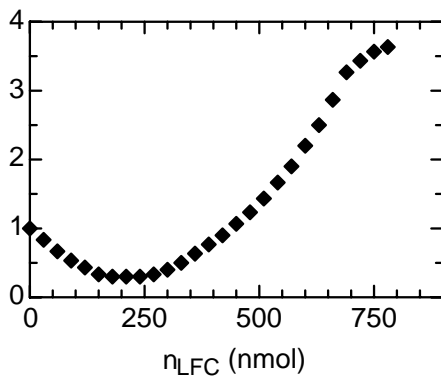

Supplement: pnas_0505877102_1.pdf [file pnas_0505877102_1.pdf]
